# Supplementary material for: Comparison of PLA-Based Micelles and Microspheres as Carriers of Epothilone B and Rapamycin. The Effect of Delivery System and Polymer Composition on Drug Release and Cytotoxicity against MDA-MB-231 Breast Cancer Cells
Source: MDPI journal article supplement (doi:10.3390/pharmaceutics13111881), 2021-11-05
Supplement: s1 [file s1]

# Supplementary Materials: Comparison of PLA-Based Micelles and Microspheres as Carriers of Epothilone B and Rapamycin. The Effect of Delivery System and Polymer Composition on Drug Release and Cytotoxicity against MDA-MB-231 Breast Cancer Cells

Katarzyna Jelonek, Alicja Zajdel, Adam Wilczok, Bożena Kaczmarczyk, Monika Musiał-Kulik, Anna Hercog, Aleksander Forys, Małgorzata Pastusiak and Janusz Kasperczyk

**Table S1.** The parameters of Peppas-Sahlin model demonstrated for the single-drug loaded DDS with epothilone B (EpoB).

| Name of DDS               | Peppas-Sahlin     |                |                |       |
|---------------------------|-------------------|----------------|----------------|-------|
|                           | (R <sup>2</sup> ) | k <sub>1</sub> | k <sub>2</sub> | m     |
| PLA 100/ PLA-PEG 0 + EpoB | 0.952             | 11.629         | 3.205          | 0.155 |
| PLA 75/ PLA-PEG 25 + EpoB | 0.992             | 22.307         | −1.323         | 0.320 |
| PLA 50/ PLA-PEG 50 + EpoB | 0.985             | 35.609         | −3.283         | 0.251 |
| PLA 25/ PLA-PEG 75 + EpoB | 0.999             | 55.800         | 0.644          | 0.083 |
| Micelles + EpoB           | 0.996             | 27.520         | −1.860         | 0.422 |

**Table S2.** The parameters of Peppas-Sahlin model demonstrated for the dual-drug loaded DDS with epothilone B (EpoB).

| Name of DDS                       | Peppas-Sahlin     |                |                |       |
|-----------------------------------|-------------------|----------------|----------------|-------|
|                                   | (R <sup>2</sup> ) | k <sub>1</sub> | k <sub>2</sub> | m     |
| PLA 100/ PLA-PEG 0 + EpoB and Rap | 0.995             | 14.749         | 0.034          | 0.163 |
| PLA 75/ PLA-PEG 25 + EpoB and Rap | 0.988             | 13.302         | −0.593         | 0.405 |
| PLA 50/ PLA-PEG 50 + EpoB and Rap | 0.992             | 14.302         | −0.562         | 0.388 |
| PLA 25/ PLA-PEG 75 + EpoB and Rap | 0.977             | 36.996         | −3.359         | 0.255 |
| Micelles + EpoB                   | 0.996             | 27.520         | −1.860         | 0.422 |

**Table S3.** The parameters of Peppas-Sahlin model demonstrated for the single-drug loaded DDS with rapamycin (Rap).

| Name of DDS              | Peppas-Sahlin     |                |                |       |
|--------------------------|-------------------|----------------|----------------|-------|
|                          | (R <sup>2</sup> ) | k <sub>1</sub> | k <sub>2</sub> | m     |
| PLA 100/ PLA-PEG 0 + Rap | 0.960             | 7.356          | 1.624          | 0.211 |
| PLA 75/ PLA-PEG 25 + Rap | 0.985             | 20.324         | −1.123         | 0.316 |
| PLA 50/ PLA-PEG 50 + Rap | 0.982             | 32.320         | −2.802         | 0.263 |
| PLA 25/ PLA-PEG 75 + Rap | 0.997             | 37.629         | 14.863         | 0.066 |
| Micelles + Rap           | 0.988             | 23.279         | −1.277         | 0.423 |

**Table S4.** The parameters of Peppas-Sahlin model demonstrated for the dual-drug loaded DDS with rapamycin (Rap).

| Name of DDS                       | Peppas-Sahlin     |                |                |       |
|-----------------------------------|-------------------|----------------|----------------|-------|
|                                   | (R <sup>2</sup> ) | k <sub>1</sub> | k <sub>2</sub> | m     |
| PLA 100/ PLA-PEG 0 + EpoB and Rap | 0.975             | 8.063          | 0.035          | 0.155 |
| PLA 75/ PLA-PEG 25 + EpoB and Rap | 0.971             | 9.804          | −0.383         | 0.421 |
| PLA 50/ PLA-PEG 50 + EpoB and Rap | 0.961             | 9.029          | −0.280         | 0.466 |
| PLA 25/ PLA-PEG 75 + EpoB and Rap | 0.982             | 18.656         | −0.895         | 0.390 |
| Micelles + EpoB and Rap           | 0.982             | 20.125         | −1.108         | 0.418 |

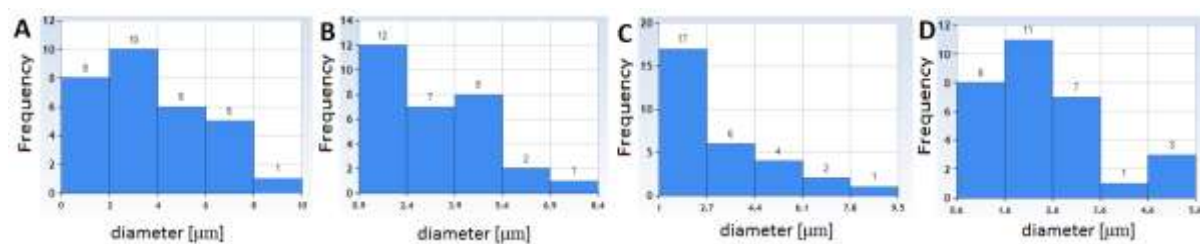

**Figure S1.** Histogram presenting distribution of dimensions of the microspheres obtained from (A) PLA 100/PLA-PEG 0; (B) PLA 75/PLA-PEG 25; (C) PLA 50/PLA-PEG 50; (D) PLA 25/PLA-PEG 75.

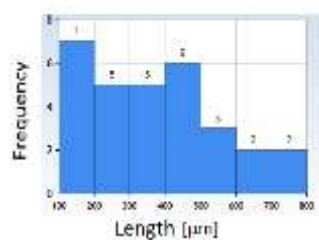

**Figure S2.** Histogram presenting distribution of dimensions of the micelles.
